# Supplementary material for: Invertible vesicles and micelles formed by dually-responsive diblock random copolymers in aqueous solutions
Source: Royal Society of Chemistry journal article supplement (doi:10.1039/c4sm01049c), 2014-01-01
Supplement: c4sm01049c1.pdf [file c4sm01049c1.pdf]

## Electronic Supplementary Information (ESI)

### Invertible vesicles and micelles formed by dually-responsive diblock random copolymers in aqueous solutions

*Mohammad T. Savoji, Satu Strandman, X. X. Zhu\**

Department of Chemistry, Université de Montréal,

CP 6128, Succursale Centre-ville, Montreal, QC, H3C 3J7, Canada

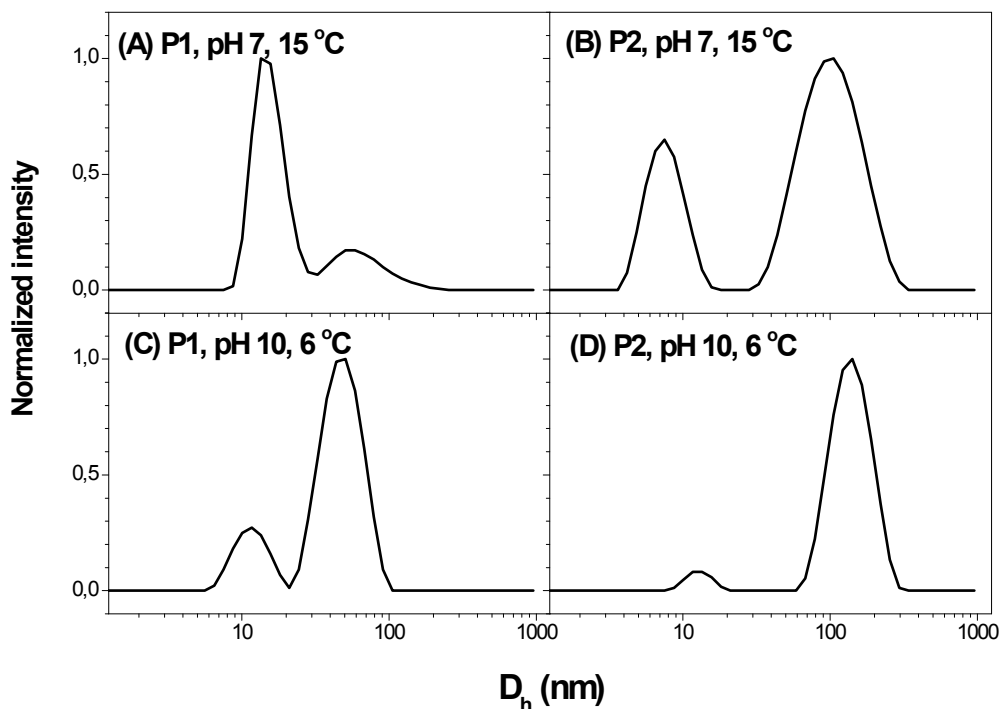

**Fig. S1.** The particle size distributions for 0.05 mg/mL aqueous solutions of (A) P1 at pH 7 and 15 °C, (B) P2 at pH 7 and 15 °C, (C) P1 at pH 10 and 6 °C, and (D) P2 at pH 10 and 6 °C as observed by DLS. The temperature is below the CP1 for both P1 and P2.

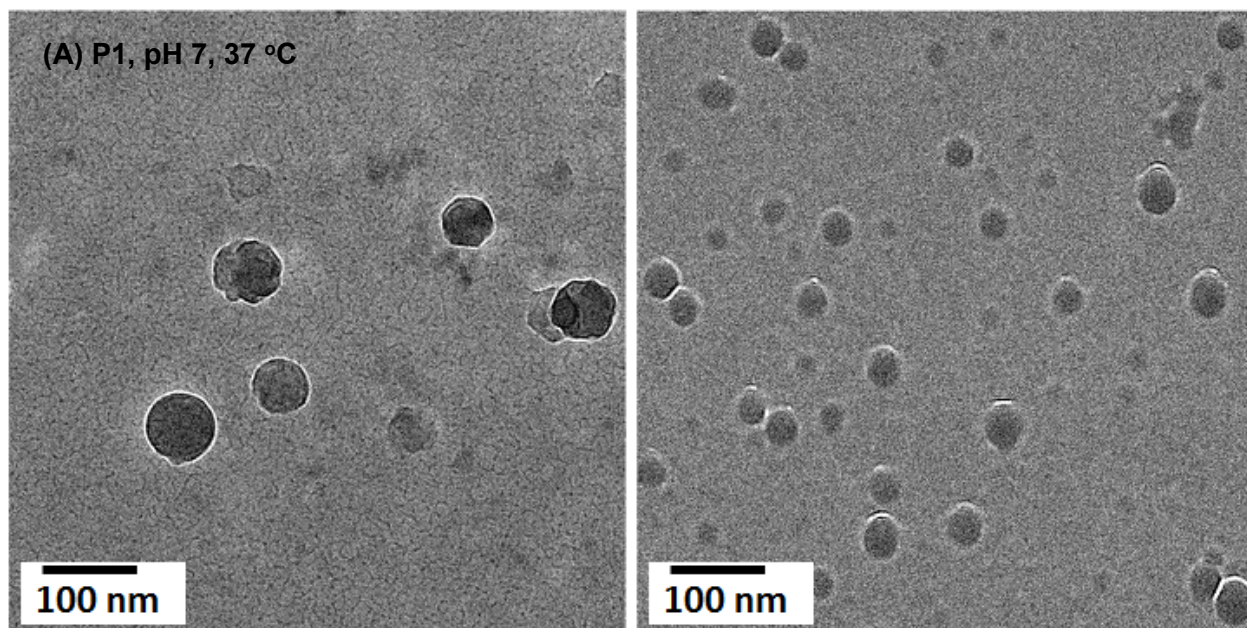

**Fig. S2.** Cryo-TEM images of 0.8 mg/mL aqueous solutions deposited on copper grids for (A) P1 at pH 7 and 37 °C, (B) P2 at pH 7 and 37 °C,

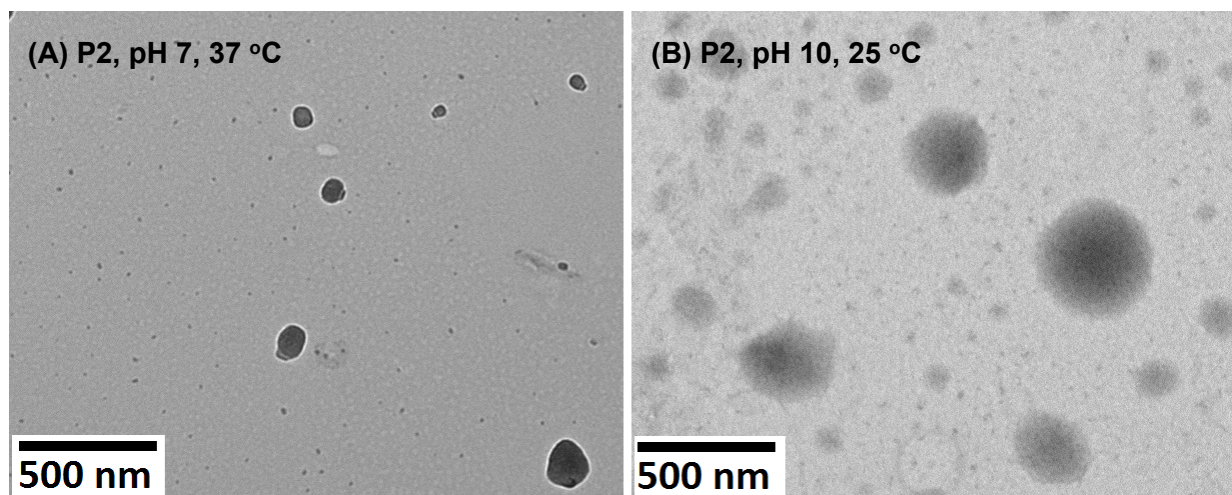

**Fig. S3.** TEM images of 0.05 mg/mL aqueous solutions deposited on copper grids for (A) P2 at pH 7 and 37 °C, (B) P2 at pH 10 and 25 °C.

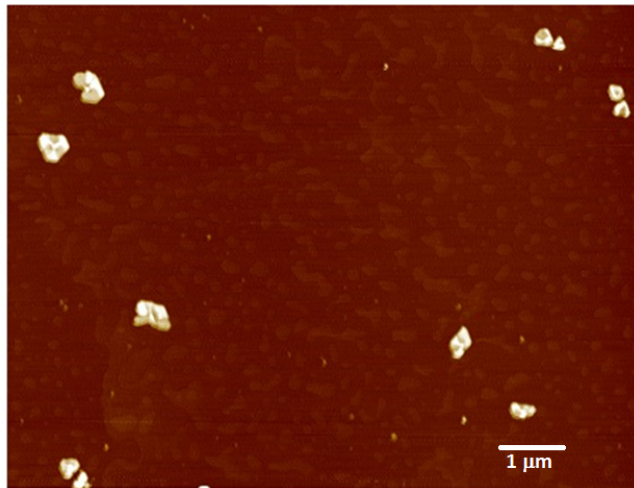

**Fig. S4.** AFM image of P2 on mica at pH 7 and 47 °C corresponding to point IV in Fig. 3A.

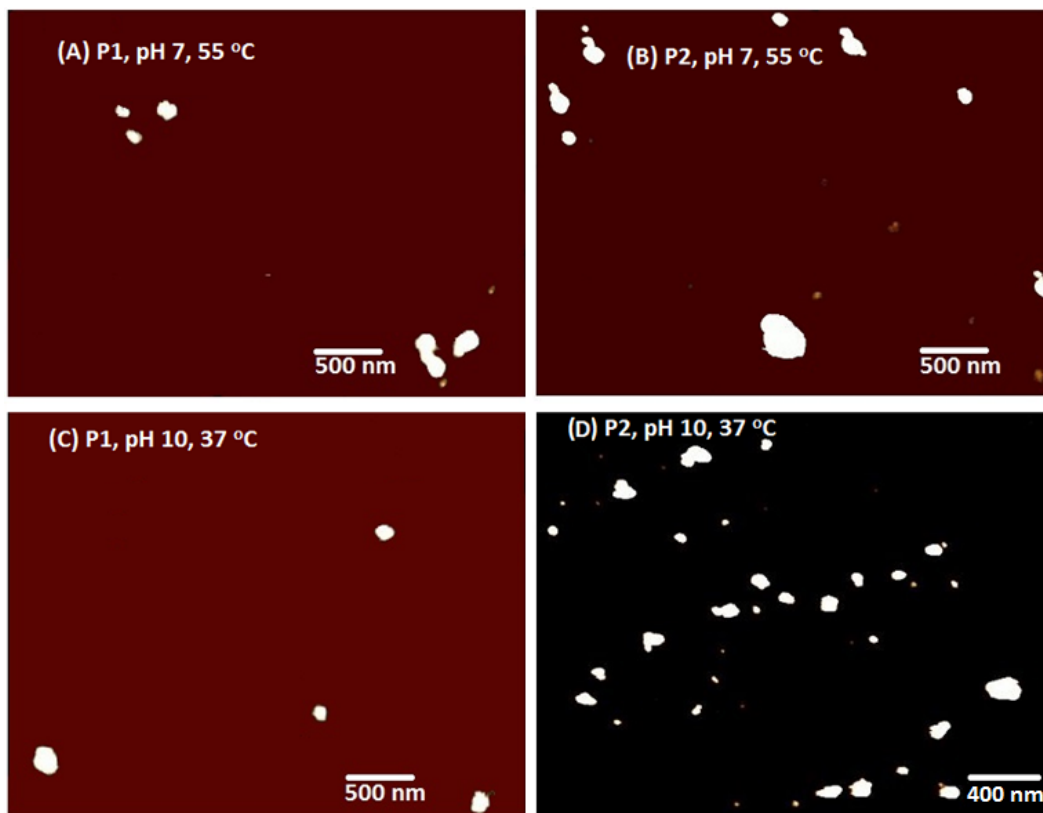

**Fig. S5.** AFM images of 0.05 mg/mL aqueous solutions of P1 and P2 above their CP2, deposited on mica. (A) P1 at pH 7 and 55 °C, (B) P2 at pH 7 and 55 °C, (C) P1 at pH 10 and 37 °C, and (D) P2 at pH 10 and 37 °C.
